# Supplementary material for: Selection signatures in goats reveal copy number variants underlying breed-defining coat color phenotypes
Source: PLOS journal article supplement (doi:10.1371/journal.pgen.1008536), 2019-12-16
Supplement: S3 (10.1371/journal.pgen.1008536.s003) [file journal.pgen.1008536.s003]

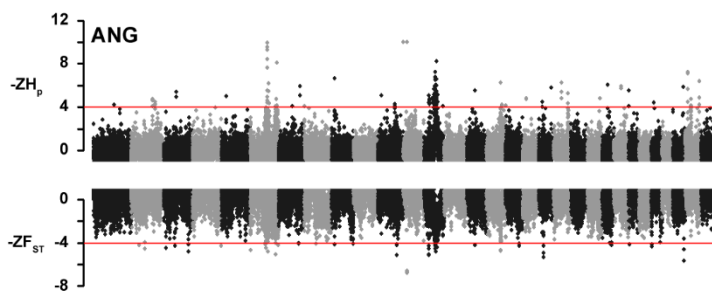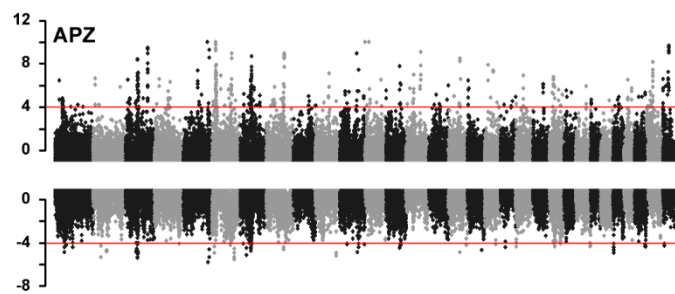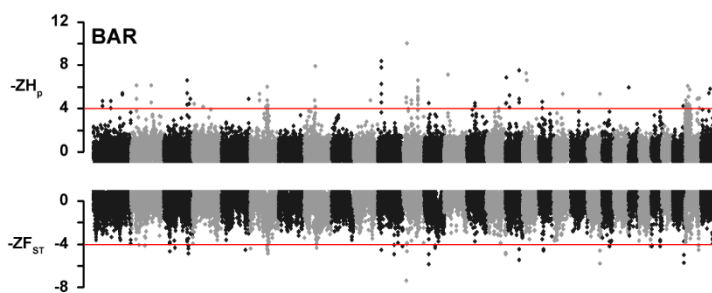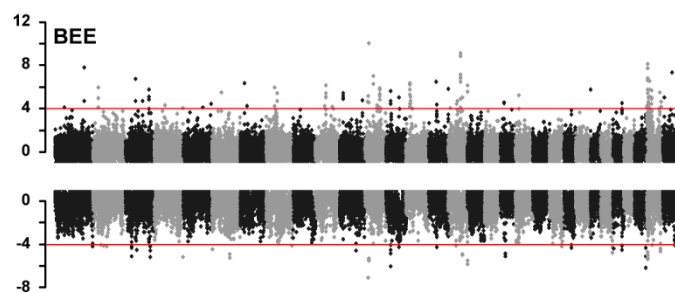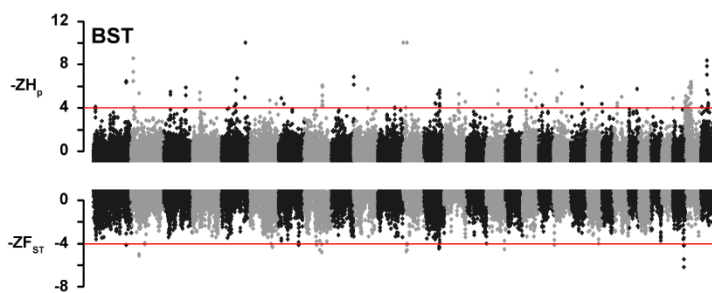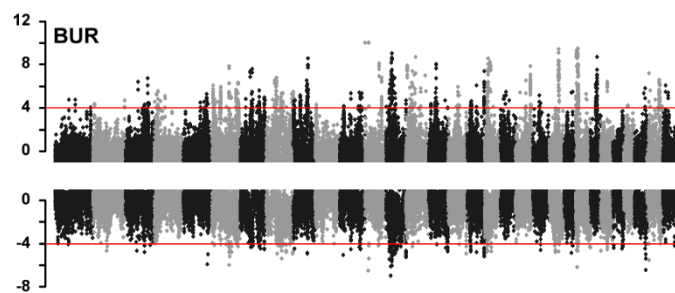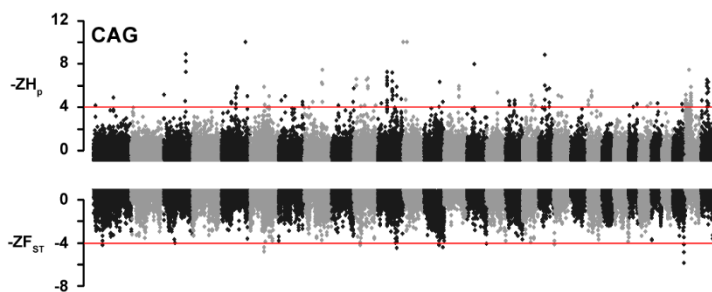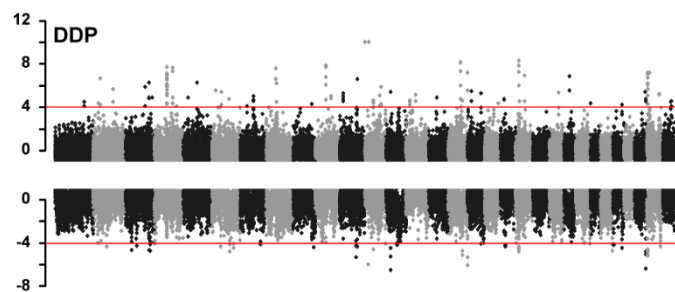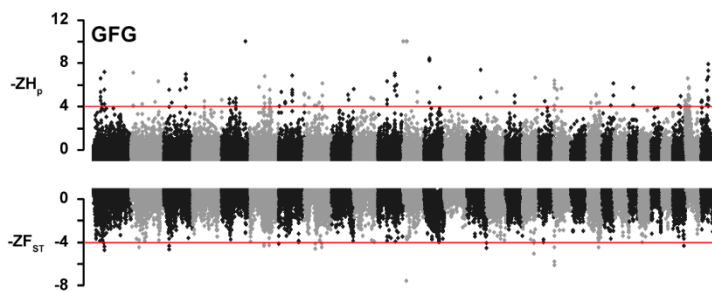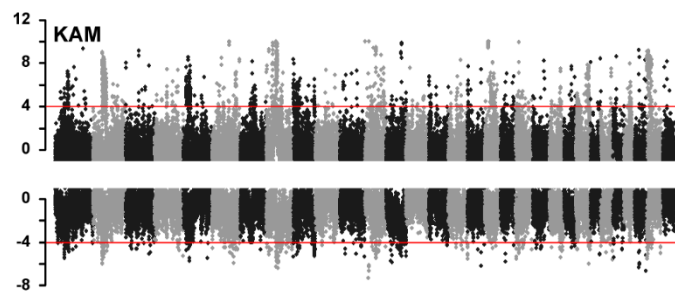

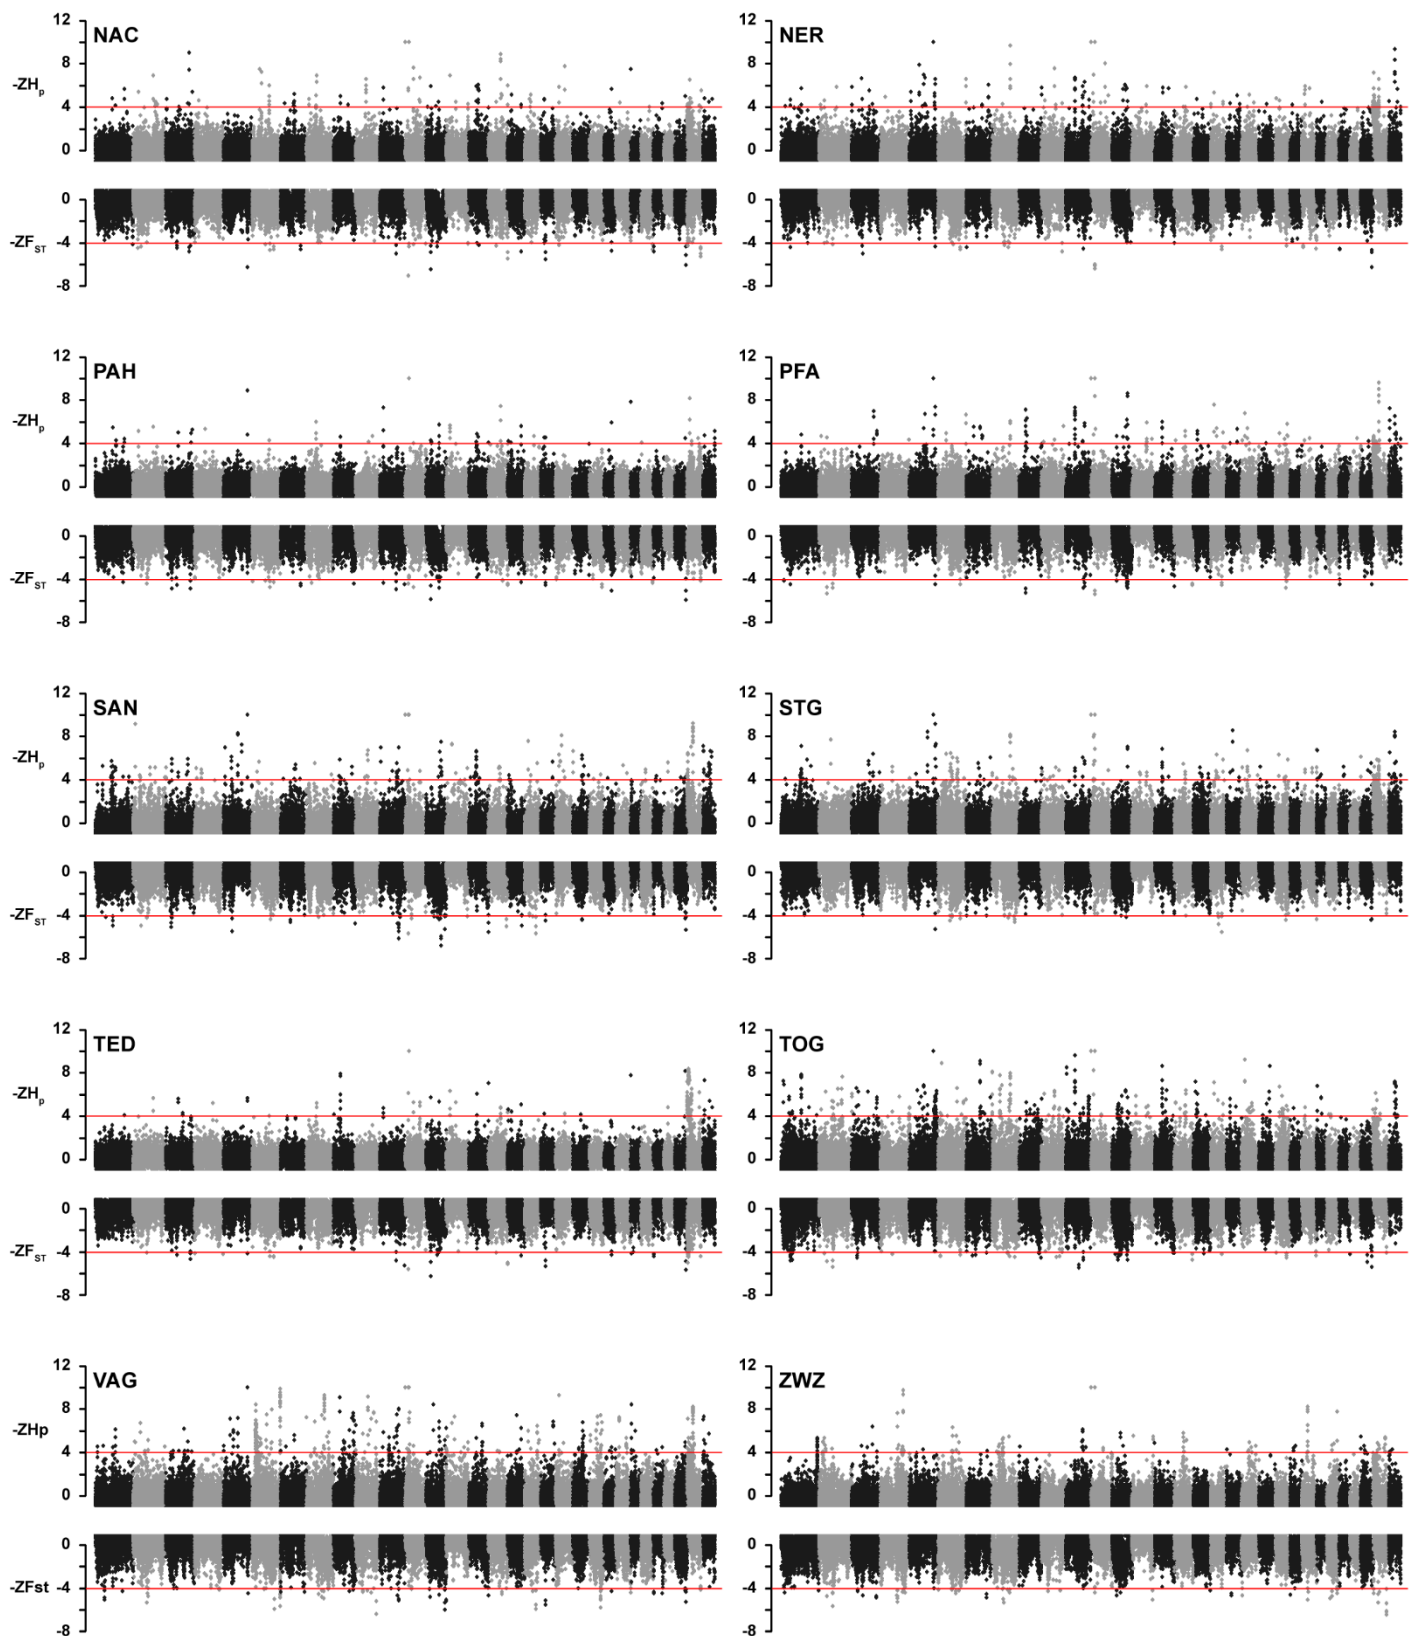

**S3 Figure.** Manhattan plots with  $-ZH_p$  and  $-ZF_{ST}$  scores of 20 diverse goat breeds. The red line indicates the chosen significance threshold of  $-ZH_p = 4$  and  $-ZF_{ST} = -4$ . Each dot represents a 150 kb window. Each plot shows 29 autosomes and two unplaced scaffolds representing the X chromosome.
